# Supplementary material
Source: HighWire-hosted journal article supplement (http://www.cmaj.ca/highwire/filestream/59028/field_highwire_adjunct_files/0/image-lopez-1-at.pdf)
Supplement: image-lopez-1-at.pdf [file image-lopez-1-at.pdf]

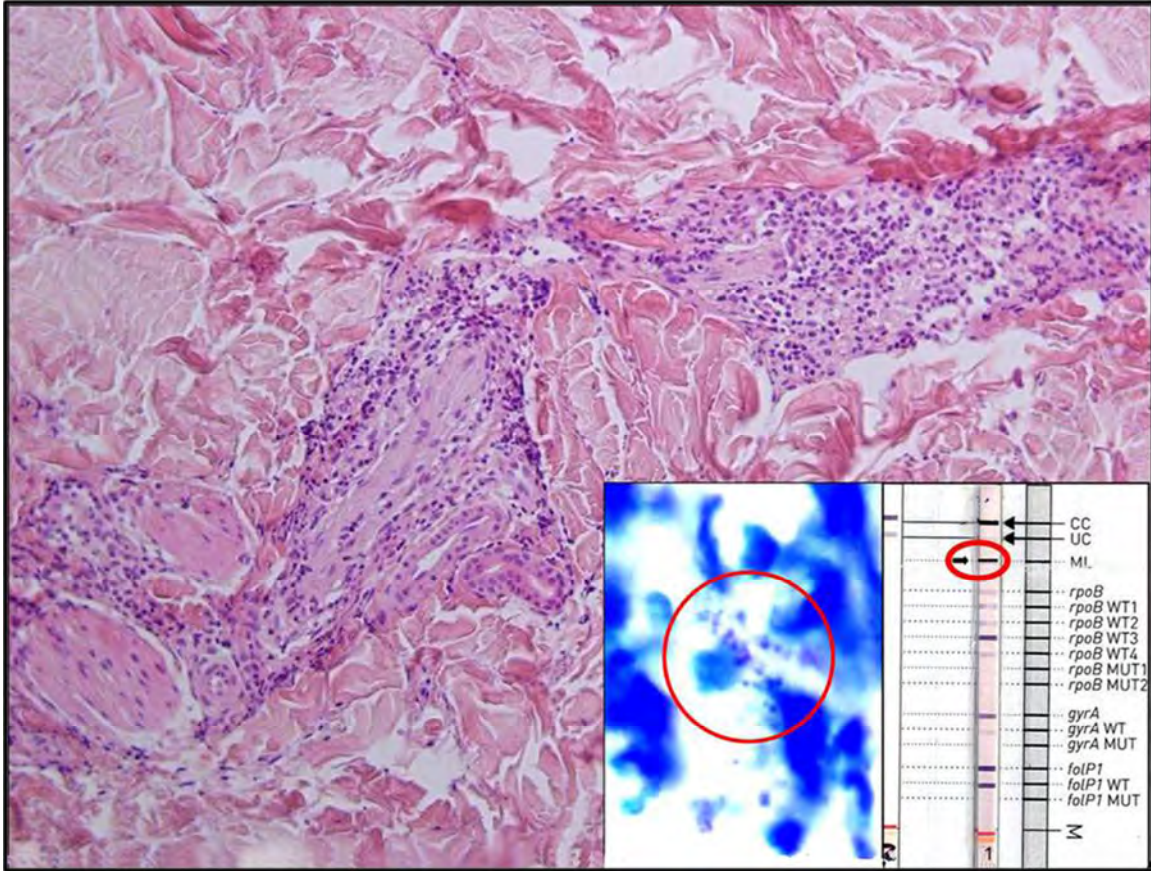

Appendix 1 (as supplied by the authors): The skin biopsy demonstrated dermal perineural granulomatous inflammation (hematoxylin and eosin stain, 100 × magnification) and scarce mycobacterium after Ziehl-Neelsen stain (inset). Inset: the *Mycobacterium leprae* PCR test was positive (Genotype LepraDR, HAIN Lifescience).
